# Supplementary material for: Diagnostic Accuracy of MRI in Detecting the Perineural Spread of Head and Neck Tumors: A Systematic Review and Meta-Analysis
Source: MDPI journal article supplement (doi:10.3390/diagnostics14010113), 2024-01-04
Supplement: s1 [file s1]

**Table S3.** Summary of MRI vendors and MRI protocols in the studies.

| First author  | Manufacturer & model          | Field strength | Coil                 | Contrast injection, agent | MRI protocols            | MRI sequences                                                                                                                       | Slice thickness (mm)            | gap (mm)    | FOV (cm)                                                                                                         | Imaging features of PNS                                                                                                                                                    |
|---------------|-------------------------------|----------------|----------------------|---------------------------|--------------------------|-------------------------------------------------------------------------------------------------------------------------------------|---------------------------------|-------------|------------------------------------------------------------------------------------------------------------------|----------------------------------------------------------------------------------------------------------------------------------------------------------------------------|
| Hanna et al.  | -                             | -              | head and neck        | -                         | conventional             | axial, coronal and sagittal T2 and T1 precontrast, axial T1 postcontrast with FS                                                    | -                               | -           | -                                                                                                                | Replacement of normal perineural fat with tumor, enhancement with gadolinium (regardless of size), and increased size of the nerve in question (regardless of enhancement) |
| Nader et al.  | -                             | -              | -                    | -                         | conventional             | axial T2, T1 precontrast, axial, coronal and sagittal T1 FS postcontrast                                                            | 3-5                             | -           | -                                                                                                                | Enhancement and asymmetry of the DFN, abnormal enhancement and/or loss of the normal T1 fat-related signal hyperintensity                                                  |
| Baulch et al. | Siemens Magnetom Skyra system | 3T             | 64 Channel Head/Neck | -                         | Targeted MRI (neurogram) | axial T2 FS, axial, coronal T1 precontrast, coronal T1 FS postcontrast, coronal T2 SPACE (3D), sagittal T1 Mprage (3D) postcontrast | 2                               | 0.4 and 0.5 | 18 (axial T2 FS, axial, coronal T1 pre-, coronal T1 FS postgad), 20 (T2 SPACE (3D)), 24 (T1 Mprage (3D) postgad) | asymmetrical thickening or enhancement with obliteration of perineural fat pads, ± secondary denervation changes in the muscles of facial expression or mastication        |
|               | GE 3T Discovery MR750         | 3T             | 64 Channel Head/Neck | -                         | Targeted MRI (neurogram) | axial and coronal T1 FSE, coronal T2 fat sat, 3D T1 fat sat contrast spoiled gradient echo (SPGR), coronal T1 fat sat               | 2mm for precontrast and 1mm for | 1           | 16 (axial T1 FSE), 18 (all other sequences)                                                                      |                                                                                                                                                                            |

|                   |                                             |                                   |                                                   |                                          |                          |                                                                                                     |                          |     |    |                                                                                                                                                                                                                                             |
|-------------------|---------------------------------------------|-----------------------------------|---------------------------------------------------|------------------------------------------|--------------------------|-----------------------------------------------------------------------------------------------------|--------------------------|-----|----|---------------------------------------------------------------------------------------------------------------------------------------------------------------------------------------------------------------------------------------------|
|                   |                                             |                                   |                                                   |                                          |                          |                                                                                                     | postcontrast SPGR images |     |    |                                                                                                                                                                                                                                             |
| Gandhi et al.     | Signa Echospeed system (GE Medical Systems) | 1,5 T                             | phased array surface (temporal lobe surface coil) | -                                        | Targeted MRI (neurogram) | coronal T2 FS, axial and coronal T1 precontrast, axial and coronal T1 FS postcontrast               | 2                        | 0.5 | 18 | asymmetrical thickening of a nerve, asymmetrical enhancement of a nerve, secondary denervation changes in the muscles of mastication and facial expression, and obliteration of perineural fat pads                                         |
|                   | Avanto system (Siemens, Germany)            | 1,5 T                             | standard head                                     | -                                        | Targeted MRI (neurogram) | axial T2 FS, axial and coronal T1 precontrast, coronal T1 FS postcontrast                           | 2                        | 1   | 20 |                                                                                                                                                                                                                                             |
| Warren et al.     | -                                           | 3T                                | -                                                 | -                                        | Targeted MRI (neurogram) | -                                                                                                   | -                        | -   | -  | -                                                                                                                                                                                                                                           |
| Chang et al.      | -                                           | -                                 | -                                                 | -                                        | conventional             | sagittal, axial, and coronal T1, axial T2 FSE with FS, axial and coronal T1 postcontrast with FS    | -                        | -   | -  | abnormal nerve thickening and/or contrast enhancement, expansion and/or erosion of skull base foramina, enhancing mass in Meckel's cave, lateral bulging of the cavernous sinus dura, and denervation atrophy of the muscles of mastication |
| Nemzek et al.     | -                                           | 1.5 and 0.3T ( <b>1 patient</b> ) | -                                                 | gadopentetate dimeglumine (0.1 mmol/ kg) | conventional             | sagittal, axial T1- and T2-WI precontrast, axial and coronal T1-WI postcontrast with fat saturation | 3-5 (for T1 WI)          | -   | -  | enhancement or enlargement of the neural foramen, enhancement of the Meckel's cave, replacement of normal fat within neural foramina, enlargement of the nerve or cavernous sinus, or enhancement of the individual nerve                   |
| Schmalfuss et al. | -                                           | -                                 | -                                                 | -                                        | -                        | -                                                                                                   | -                        | -   | -  | enlargement or abnormal enhancement of the evaluated nerves or obliteration of the perineural fat pad or both                                                                                                                               |

|                  |                                      |      |      |                                                          |              |                                                                                                                                                                   |                                                 |      |       |                                                                                                                                                                                                                                                                                                                                                                                                                                                           |
|------------------|--------------------------------------|------|------|----------------------------------------------------------|--------------|-------------------------------------------------------------------------------------------------------------------------------------------------------------------|-------------------------------------------------|------|-------|-----------------------------------------------------------------------------------------------------------------------------------------------------------------------------------------------------------------------------------------------------------------------------------------------------------------------------------------------------------------------------------------------------------------------------------------------------------|
| Majoie et al.    | -                                    | -    | -    | gadopentetate dimeglumine (0.1 mmol/kg)                  | conventional | axial T2 SE and PD SE, coronal, axial T1 SE precontrast, coronal, axial T1 SE postcontrast with and without FS                                                    | 3mm (for T1 SE pre- and postcontrast sequences) | -    | -     | abnormal nerve thickening with enhancement; concentric expansion of the skull base foramina and extracranial nerve canals; replacement of the normal trigeminal cistern hypointensity on T1-weighted images or hyperintensity on T2-weighted images by an isointense mass or enhancement of a mass in the Meckel's cave/gasserian ganglion area; lateral bulging of the cavernous sinus dural membranes and denervation atrophy of the masticator muscles |
| Shimamoto et al. | Signa LX, GE                         | 1,5T | head | Magnevist, Omniscan, Prohance (0.2 ml kg <sup>-1</sup> ) | conventional | axial T1 and T2 FSE without or with chemical shift selective FS, postcontrast T1 (axial, cor) with chemical shift selective FS                                    | 5                                               | 1    | 25x25 | abnormal signal intensity, contrast enhancement or widening of the pterygopalatine fossa, palatine foramen, incisive canal, mandibular foramen and mandibular canal, and enlargement or excessive contrast enhancement of a nerve                                                                                                                                                                                                                         |
| Tomura et al     | Signa or Horizon; GE Medical Systems | 1,5T | -    | gadopentetate dimeglumine (Gd-DTPA; Schering, AG),       | conventional | axial T2 SE and PD SE, axial T2 FSE and PD FSE, cor, axial, sagittal T1 precontrast, cor, axial T1 postcontrast with and without fatsat, sagittal T1 postcontrast | 3-5                                             | 1, 2 | 18-22 | Obliteration of fat within the pterygopalatine fossa                                                                                                                                                                                                                                                                                                                                                                                                      |

#### Notes

“-“ signifies missing data

FS - fat-suppressed

FSE - fast spin echo

DFN - descending facial nerve

SMF - stylomastoid foramen
