# Supplementary material for: Diagnostic Accuracy of MRI in Detecting the Perineural Spread of Head and Neck Tumors: A Systematic Review and Meta-Analysis
Source: MDPI journal article supplement (doi:10.3390/diagnostics14010113), 2024-01-04
Supplement: s1 [file s1]

**Table S2.** Summary of cranial nerves afflicted by PNS, site of tumor origin and histology.

| Author                        | Cranial nerves examined for PNS   | Cranial nerves afflicted by PNS                                                                                                      | Tumor Histology                                                                                                                                         | Site of tumor origin                                                                                                                                             |
|-------------------------------|-----------------------------------|--------------------------------------------------------------------------------------------------------------------------------------|---------------------------------------------------------------------------------------------------------------------------------------------------------|------------------------------------------------------------------------------------------------------------------------------------------------------------------|
| Hanna et al.                  | -                                 | -                                                                                                                                    | ACC                                                                                                                                                     | PG, sinuses, NP                                                                                                                                                  |
| Nader et al.<br>(DFN model 1) | ITFN (DFN segment)                | 8 DFN                                                                                                                                | ACC, SCC, salivary ductal carcinoma, acinic cell carcinoma, adenocarcinoma, MEC, carcinosarcoma, oncocytic carcinoma, BCC with squamous differentiation | -                                                                                                                                                                |
| Nader et al.<br>(DFN model 2) | ITFN (DFN segment)                | 5 DFN                                                                                                                                | ACC, SCC, salivary ductal carcinoma, acinic cell carcinoma, adenocarcinoma, MEC, carcinosarcoma, oncocytic carcinoma, BCC with squamous differentiation | -                                                                                                                                                                |
| Nader et al.<br>(SMF)         | ITFN (SMF segment)                | 16 SMF                                                                                                                               | ACC, SCC, salivary ductal carcinoma, acinic cell carcinoma, adenocarcinoma, MEC, carcinosarcoma, oncocytic carcinoma, BCC with squamous differentiation | -                                                                                                                                                                |
| Baulch et al.                 | 9 V1, 21 V2, 14 V3, 13 VII, 1 ATN | 8 V1, 12 V2, 9 V3, 9 VII                                                                                                             | SCC, melanoma, ACC, salivary gland tumor                                                                                                                | -                                                                                                                                                                |
| Gandhi et al.                 | 8 V1, 21 V2, 11 V3, 8 VII         | 5 V1, 13 V2, 5 V3, 7 VII                                                                                                             | SCC, BCC, desmoplastic melanoma, poorly differentiated adenocarcinoma                                                                                   | -                                                                                                                                                                |
| Warren et al.                 | V, VII                            | 12 V3 and VII, 18 VII, 18 V1, 21 V2, 14 V3, 2 great auricular nerves                                                                 | cutaneous SCC                                                                                                                                           | unknown origin (28%), cheek (20%), nose (16%), temple (14%), forehead (8%), preauricular (8%), ear (2%), eyelid (2%), postauricular (2%)                         |
| Chang et al.                  | -                                 | 4 V1, 4 V2, 5 V3, 3 III, 2 IV, 4 VI, 4 VII, 1 VIII, 1 IX, 1 X, 1 XI, 1 XII                                                           | Melanoma (5 desmoplastic, 2 mucosal, 1 poorly differentiated spindle-cell melanotic tumor)                                                              | forehead (12.5), nose (12.5), NP (12.5%), lower (25%) and upper (12.5%) lip, supraorbital skin (12.5%), infraorbital skin (12.5%)                                |
| Nemzek et al.                 | -                                 | 16 V (5 in Meckel's cave, 7 in the cavernous sinus, 1 V1, 6 V2, 5 V3), 4 ION, 3 IV, 3 XII, 4 III, 4 VI, 1 II, 2 VII, 2 IX, 2 X, 2 XI | ACC, SCC, poorly differentiated carcinoma, salivary duct carcinoma, MEC, chordoma, meningioma                                                           | NP (26%), PG (16%), nasal cavity (11%), maxillary sinus (11%), RMT (11%), clivus (5%), middle fossa (5%), eyelid inferior (5%), ethmoid (5%), forehead skin (5%) |

|                   |                                                                   |                                                                                                                                                  |                                                                                                                                                                                             |                                                                                                            |
|-------------------|-------------------------------------------------------------------|--------------------------------------------------------------------------------------------------------------------------------------------------|---------------------------------------------------------------------------------------------------------------------------------------------------------------------------------------------|------------------------------------------------------------------------------------------------------------|
| Schmalfuss et al. | VII, ATN, V3, trigeminal cistern rootlets and trigeminal ganglion | 5 V3, 1 V2, 7 ATN, 6 VII                                                                                                                         | ACC, adenocarcinoma, SCC, MEC, metastatic undifferentiated carcinoma of unknown primary site combined with lymphoma, malignant schwannoma, neurofibroma, tumor of unknown pathologic origin | PG, skin, unknown primary site                                                                             |
| Majoie et al.     | V                                                                 | 1V2, 1 V1                                                                                                                                        | malignant melanoma cheek, Non-Hodgkin lymphoma                                                                                                                                              | cheek, orbit                                                                                               |
| Shimamoto et al.  | -                                                                 | -                                                                                                                                                | ACC                                                                                                                                                                                         | palate (45%), sublingual gland (18%), lip (9%), cheek (9%), retromolar region (9%), angle of mandible (9%) |
| Tomura et al.     | PPF obliteration                                                  | infratemporal fossa, sphenopalatine foramen, sphenoid sinus, greater palatine canal, inferior orbital fissure, pterygoid canal, foramen rotundum | SCC, NP angiofibroma                                                                                                                                                                        | maxillary sinus (83.4%), NP (8.3%), gingiva (8.3%)                                                         |

## Notes

“-“ signifies missing data

ITFN - intratemporal facial nerve

DFN - descending facial nerve

SMF - stylomastoid foramen

ION - infraorbital nerve

PPF - pterygopalatine fossa

ATN - auriculotemporal nerve

MEC PG - mucoepidermoid carcinoma parotid gland

RMT - retromolar trigone

RLN - recurrent laryngeal nerve

ACC -adenoid cystic carcinoma

SCC - squamous cell carcinoma

BCC - basal cell carcinoma
