# Supplementary material for: Diagnostic Accuracy of MRI in Detecting the Perineural Spread of Head and Neck Tumors: A Systematic Review and Meta-Analysis
Source: MDPI journal article supplement (doi:10.3390/diagnostics14010113), 2024-01-04
Supplement: s1 [file s1]

Results of the assessment of various domains and scoring system of the QUADAS-2 tool

|    |                                                                                                                                                                                                                                                                                                                                                               |
|----|---------------------------------------------------------------------------------------------------------------------------------------------------------------------------------------------------------------------------------------------------------------------------------------------------------------------------------------------------------------|
| 1  | <b>RISK OF BIAS</b><br>Concerns about risk of bias were rated as “yes,” “no” or “unclear.” The “unclear” category was used when incomplete data were reported. “Yes” indicates low risk of bias, and “no” or “unclear” indicates high risk of bias                                                                                                            |
| 1a | <b><i>Patient selection</i></b><br>Could the selection of patients have introduced bias?<br>*Was a consecutive sample enrolled?<br>* Was the selection method of patients reported?<br>consecutive – yes (Low bias), no information – no (High bias)                                                                                                          |
| 1b | <b><i>Index test</i></b><br>Could the conduct or interpretation of the index test introduce bias?<br>*Did all studies report MRI features of perineural spread of head and neck tumors?<br>If reported – yes (Low), not reported -no (High)                                                                                                                   |
| 1c | <b><i>Reference standard</i></b><br>Could the reference standard or its conduct or interpretation have introduced bias?<br>*Which reference method was used?<br>*Did all patients undergo the reference method?<br>histology and/or surgery, complete reference method – yes (low); histology and/or surgery, incomplete reference method – unclear (unclear) |
| 1d | <b><i>Flow and timing</i></b><br>Could the patient flow have introduced bias?<br>*Was there an appropriate interval between the index test and reference standard?<br>– <b>yes</b> for all studies ( <b>low</b> )                                                                                                                                             |
| 2  | <b>APPLICABILITY CONCERN</b><br>Concerns about applicability were rated as “low,” “high,” or “unclear.” The “unclear” category was used only when insufficient data are reported.                                                                                                                                                                             |
| 2a | <b><i>Patient selection</i></b><br>Whether the histology of all tumors with perineural spread included in the studies:<br>- if included - LOW, not included -HIGH                                                                                                                                                                                             |
| 2b | <b><i>Index test</i></b><br>Did all studies report data on MRI protocols:<br>– yes – LOW, no – High, incomplete - unclear                                                                                                                                                                                                                                     |
| 2c | <b><i>Reference standard</i></b><br>Whether pathologists were blinded or not:<br>- LOW for all studies                                                                                                                                                                                                                                                        |

Results of the assessment of various domains of the QUADAS-2 tool

|                     | <b>Risk of bias</b>      |                   |                           |                        | <b>Applicability concern</b> |                   |                           |
|---------------------|--------------------------|-------------------|---------------------------|------------------------|------------------------------|-------------------|---------------------------|
| <b>First author</b> | <b>Patient selection</b> | <b>Index test</b> | <b>Reference standard</b> | <b>Flow and timing</b> | <b>Patient selection</b>     | <b>Index test</b> | <b>Reference standard</b> |
| Hanna et al.        | yes                      | yes               | yes                       | yes                    | Low                          | unclear           | Low                       |
| Nader et al.        | no                       | yes               | yes                       | yes                    | Low                          | unclear           | Low                       |
| Baulch et al.       | no                       | yes               | yes                       | yes                    | Low                          | Low               | Low                       |
| Gandhi et al.       | no                       | yes               | yes                       | yes                    | Low                          | Low               | Low                       |
| Warren et al.       | yes                      | no                | yes                       | yes                    | Low                          | High              | Low                       |
| Chang et al.        | no                       | yes               | yes                       | yes                    | Low                          | unclear           | Low                       |
| Nemzek et al.       | no                       | yes               | yes                       | yes                    | Low                          | unclear           | Low                       |
| Schmalfuss et al.   | no                       | yes               | unclear                   | yes                    | Low                          | High              | Low                       |
| Majoie et al.       | no                       | yes               | unclear                   | yes                    | Low                          | unclear           | Low                       |
| Shimamoto et al.    | no                       | yes               | yes                       | yes                    | Low                          | Low               | Low                       |
| Tomura et al.       | yes                      | yes               | unclear                   | yes                    | Low                          | Low               | Low                       |
