# Supplementary material for: Diagnostic Accuracy of MRI in Detecting the Perineural Spread of Head and Neck Tumors: A Systematic Review and Meta-Analysis
Source: MDPI journal article supplement (doi:10.3390/diagnostics14010113), 2024-01-04
Supplement: s1 [file s1]

**Table S6 – Summary of histological forms of head and neck tumors afflicted by PNS**

| First author                                                     | Nader et al.          | Baulch et al. | Gandhi et al. | Nemzek et al. | Tomura et al. | Schmalfuss et al.    | Hanna et al. | Warren et al. | Chang et al. | Shimamoto et al.      | Majoie et al.        | Summary    |
|------------------------------------------------------------------|-----------------------|---------------|---------------|---------------|---------------|----------------------|--------------|---------------|--------------|-----------------------|----------------------|------------|
| <b>Patients' number with PNS who had reference standard test</b> | <b>21 (out of 58)</b> | <b>33</b>     | <b>25</b>     | <b>19</b>     | <b>12</b>     | <b>7 (out of 15)</b> | <b>26</b>    | <b>48</b>     | <b>8</b>     | <b>11 (out of 13)</b> | <b>2 (out of 15)</b> | <b>171</b> |
| <b>Tumor histology</b>                                           |                       |               |               |               |               |                      |              |               |              |                       |                      |            |
| SCC                                                              | 9 (42.9%)             | 27(81.8%)     | 22(88%)       | 10(52.6%)     | 11(91.7%)     | 2(28.6%)             |              | 48(100%)*     |              |                       |                      | <b>129</b> |
| ACC                                                              | 3(14.3%)              | 2(6.1%)       |               | 4(21%)        |               | 2(28.6%)             | 26(100%)     |               |              | 11(100%)              |                      | <b>48</b>  |
| Melanoma                                                         |                       | 3(9.1%)       | 1(4%)#        |               |               |                      |              |               | 8(100%)      |                       | 1(50%)               | <b>13</b>  |
| Mucoepidermoid carcinoma                                         | 1 (4.8%)              |               |               | 1(5.3%)       |               | 1(14.3%)             |              |               |              |                       |                      | <b>3</b>   |
| Salivary ductal carcinoma                                        | 3(14.3%)              |               |               | 1(5.3%)       |               |                      |              |               |              |                       |                      | <b>4</b>   |
| Salivary gland tumor                                             |                       | 1(3%)         |               |               |               |                      |              |               |              |                       |                      | <b>1</b>   |
| nasopharyngeal angiofibroma                                      |                       |               |               |               | 1(8.3%)       |                      |              |               |              |                       |                      | <b>1</b>   |
| BCC                                                              |                       |               | 1(4%)         |               |               |                      |              |               |              |                       |                      | <b>1</b>   |
| BCC with squamous differentiation                                | 1 (4.8%)              |               |               |               |               |                      |              |               |              |                       |                      | <b>1</b>   |
| small round cell neoplasm                                        |                       |               |               |               |               |                      |              |               |              |                       |                      |            |
| Lymphoma                                                         |                       |               |               |               |               |                      |              |               |              |                       | 1(50%)               | <b>1</b>   |



[illegible]
