# Supplementary material for: Diagnostic Accuracy of MRI in Detecting the Perineural Spread of Head and Neck Tumors: A Systematic Review and Meta-Analysis
Source: MDPI journal article supplement (doi:10.3390/diagnostics14010113), 2024-01-04
Supplement: s1 [file s1]

**Table S5.** Distribution of trigeminal and facial nerves afflicted by PNS in the studies.

| <b>Authors</b>        | <b>V1</b> | <b>V2</b> | <b>V3</b> | <b>VII</b> |
|-----------------------|-----------|-----------|-----------|------------|
| Gandhi et al.         | 5         | 13        | 5         | 7          |
| Warren et al.         | 18        | 21        | 14        | 18         |
| Baulch et al.         | 8         | 12        | 9         | 9          |
| Chang et al.          | 4         | 4         | 5         | 4          |
| Nemzek et al.         | 1         | 6         | 5         | 2          |
| Schmalfuss et al.     | -         | 1         | 5         | 6          |
| Majoie et al.         | 1         | 1         | -         | -          |
| Nader et al<br>(ITFN) | -         | -         | -         | 24         |
| <b>Total</b>          | <b>37</b> | <b>58</b> | <b>43</b> | <b>70</b>  |

Notes:

“-“ signifies missing data

V1 – ophthalmic division of the trigeminal nerve

V2 – maxillary division of the trigeminal nerve

V3 - mandibular division of the trigeminal nerve

ITFN - intratemporal facial nerve
