# Supplementary material for: Diagnostic Accuracy of MRI in Detecting the Perineural Spread of Head and Neck Tumors: A Systematic Review and Meta-Analysis
Source: MDPI journal article supplement (doi:10.3390/diagnostics14010113), 2024-01-04
Supplement: s1 [file s1]

**Table S1.** QUADAS-2 assessments.

|                     | <b>Risk of bias</b>      |                   |                           |                        | <b>Applicability concern</b> |                   |                           |
|---------------------|--------------------------|-------------------|---------------------------|------------------------|------------------------------|-------------------|---------------------------|
| <b>First author</b> | <b>Patient selection</b> | <b>Index test</b> | <b>Reference standard</b> | <b>Flow and timing</b> | <b>Patient selection</b>     | <b>Index test</b> | <b>Reference standard</b> |
| Hanna et al.        | Low                      | Low               | Low                       | Low                    | Low                          | Unclear           | Low                       |
| Nader et al.        | High                     | Low               | Low                       | Low                    | Low                          | Unclear           | Low                       |
| Baulch et al.       | High                     | Low               | Low                       | Low                    | Low                          | Low               | Low                       |
| Gandhi et al.       | High                     | Low               | Low                       | Low                    | Low                          | Low               | Low                       |
| Warren et al.       | Low                      | High              | Low                       | Low                    | Low                          | High              | Low                       |
| Chang et al.        | High                     | Low               | Low                       | Low                    | Low                          | unclear           | Low                       |
| Nemzek et al.       | High                     | Low               | Low                       | Low                    | Low                          | Unclear           | Low                       |
| Schmalfuss et al.   | High                     | Low               | unclear                   | Low                    | Low                          | High              | Low                       |
| Majoie et al.       | High                     | Low               | unclear                   | Low                    | Low                          | unclear           | Low                       |
| Shimamoto et al.    | High                     | Low               | Low                       | Low                    | Low                          | Low               | Low                       |
| Tomura et al.       | Low                      | Low               | unclear                   | Low                    | Low                          | Low               | Low                       |
