# Supplementary material for: Diagnostic Accuracy of MRI in Detecting the Perineural Spread of Head and Neck Tumors: A Systematic Review and Meta-Analysis
Source: MDPI journal article supplement (doi:10.3390/diagnostics14010113), 2024-01-04
Supplement: s1 [file s1]

**Table S4.** MRI protocols used in the studies.

| <b>Total<br/>n = 11</b>                 | <b>Sequences</b>                            | <b>slice thickness, TR, TE</b>      |
|-----------------------------------------|---------------------------------------------|-------------------------------------|
| <b>Conventional protocols,<br/>n= 7</b> |                                             |                                     |
| <b>1. Hanna et al.</b>                  | axial T2                                    | -                                   |
|                                         | coronal T2                                  | -                                   |
|                                         | sagittal T2                                 | -                                   |
|                                         | axial T1 precontrast                        | -                                   |
|                                         | axial T1 postcontrast with FS               | -                                   |
| <b>2. Tomura et al.</b>                 | axial T2 SE                                 | 3-5 mm, 1800-3000 ms,<br>80-100 ms  |
|                                         | axial PD SE                                 | 3-5 mm, 1800-3000 ms,<br>30-40 ms   |
|                                         | axial T2 FSE                                | 3-5 mm, 3800-4200 ms,<br>100-112 ms |
|                                         | axial PD FSE                                | 3-5 mm, 3800-4200 ms,<br>100-112 ms |
|                                         | axial T1                                    | 3-5mm, 300-680ms, 11-22<br>ms       |
|                                         | coronal T1                                  | 3-5mm, 300-680ms, 11-12<br>ms       |
|                                         | axial T1 postcontrast with and without FS   | 3-5mm, -                            |
|                                         | coronal T1 postcontrast with and without FS | 3-5mm, -                            |
|                                         | sagittal T1 pre- and postcontrast           | 3-5mm, -                            |
| <b>3. Nemzek et al.</b>                 | axial T1 precontrast                        | 3-5 mm, -                           |
|                                         | sagittal T1 precontrast                     | 3-5 mm, -                           |
|                                         | axial T2                                    | -                                   |
|                                         | sagittal T2                                 | -                                   |
|                                         | axial T1 postcontrast with fat saturation   | 3-5 mm, -                           |
|                                         | coronal T1 postcontrast with fat saturation | 3-5 mm, -                           |
| <b>4. Chang et al.</b>                  | axial T2 FSE with FS                        | -                                   |
|                                         | axial T1 precontrast                        | -                                   |
|                                         | sagittal T1 precontrast                     | -                                   |
|                                         | coronal T1 precontrast                      | -                                   |
|                                         | axial T1 postcontrast with FS               | 600 ms, 11 ms                       |
|                                         | coronal T1 postcontrast with FS             | 600 ms, 11 ms                       |
| <b>5. Nader et al.</b>                  | axial T2                                    | 3-5 mm, -                           |

|                                                         |                                                                     |                                |
|---------------------------------------------------------|---------------------------------------------------------------------|--------------------------------|
|                                                         | axial T1 precontrast                                                | 3-5 mm, -                      |
|                                                         | axial T1 FS postcontrast                                            | 3-5 mm, -                      |
|                                                         | coronal T1 FS postcontrast                                          | 3-5 mm, -                      |
|                                                         | sagittal T1 FS postcontrast                                         | 3-5 mm, -                      |
| <b>6. Shimamoto et al.</b>                              | axial T2 FSE with or without chemical shift selective FS            | 5mm, 3500ms, 98 ms             |
|                                                         | axial T1 precontrast SE without or with chemical shift selective FS | 5mm, 400-500ms, 9-10 ms        |
|                                                         | axial T1 postcontrast SE with chemical shift selective FS           | 5mm, 400-500ms, 9-10 ms        |
|                                                         | coronal T1 postcontrast SE with chemical shift selective FS         | 5mm, -                         |
| <b>7. Majoie et al.</b>                                 | axial PD SE                                                         | -                              |
|                                                         | axial T2 SE                                                         | -                              |
|                                                         | axial TI SE precontrast                                             | 3 mm, -                        |
|                                                         | coronal TI SE precontrast                                           | 3 mm, -                        |
|                                                         | axial TI SE postcontrast with and without FS                        | 3 mm, -                        |
|                                                         | coronal TI SE postcontrast with and without FS                      | 3 mm, -                        |
| <b>Targeted MRI (neurography) protocols, n=4 (33 %)</b> | <b>Sequences</b>                                                    | <b>slice thickness, TR, TE</b> |
| <b>1. Gandhi et al. (GE) 1.5T</b>                       | coronal T2 FS                                                       | 2 mm, 6800 ms, 102 ms          |
|                                                         | axial T1 precontrast                                                | 2 mm, 680 ms, Min full         |
|                                                         | coronal T1 precontrast                                              | 2 mm, 680 ms, Min full         |
|                                                         | axial T1 FS post contrast                                           | 2 mm, 675 ms, Min full         |
|                                                         | coronal T1 FS post contrast                                         | 2 mm, 675 ms, Min full         |
| <b>2. Gandhi et al. (Siemens) 1.5T</b>                  | axial T2 FS                                                         | 2 mm, 3300 ms, 99 ms           |
|                                                         | axial T1 precontrast                                                | 2 mm, 620 ms, 15 ms            |
|                                                         | coronal T1 precontrast                                              | 2 mm, 620 ms, 15 ms            |
|                                                         | coronal T1 FS post contrast                                         | 2 mm, 581 ms, 13 ms            |
| <b>3. Baulch et al. (Siemens) 3T</b>                    | axial T2 FS                                                         | 2 mm, 4400 ms, 89 ms           |
|                                                         | axial T1 precontrast                                                | 2 mm, 798 ms, 9.1 ms           |
|                                                         | coronal T1 precontrast                                              | 2 mm, 750 ms, 9.1 ms           |
|                                                         | coronal T1 FS postcontrast                                          | 2 mm, 986 ms, 9.1 ms           |
|                                                         | coronal T2 3D SPACE                                                 | - , 1000 ms, 136 ms            |
|                                                         | sagittal T1 Mprage (3D) postcontrast                                | - , 2300 ms, 2.29 ms           |
| <b>4. Baulch et al. (GE) 3T</b>                         | axial T1 FSE precontrast                                            | 2 mm, 808 ms, min full         |
|                                                         | coronal T1 FSE precontrast                                          | 2 mm, 711 ms, min full         |
|                                                         | coronal T2 fat sat                                                  | 2 mm, 7015 ms, 85 ms           |

|  |                                                     |                           |
|--|-----------------------------------------------------|---------------------------|
|  | coronal T1 fat sat                                  | 2 mm, 683 ms, min full ms |
|  | 3D T1 fat sat contrast spoiled gradient echo (SPGR) | 1 mm, 6.6 ms, minimum     |

*Notes:*

*“-“ signifies missing data*

*TE - echo time, TR - repetition time, TSE - turbo spin echo, FSE – fast spin echo, FS – fat suppression, PD – proton density, 3D SPACE - three-dimensional sampling perfection with application-optimized contrasts by using different flip angle evolutions, Mprage - magnetization-prepared rapid gradient echo, SPGR - spoiled gradient-recalled (SPGR) sequence*
