# Supplementary material for: Diagnostic Accuracy of MRI in Detecting the Perineural Spread of Head and Neck Tumors: A Systematic Review and Meta-Analysis
Source: MDPI journal article supplement (doi:10.3390/diagnostics14010113), 2024-01-04
Supplement: s1 [file s1]

## Database search strategy

|    | Key words and operators                      | Combination of key words                                                                                                                            |
|----|----------------------------------------------|-----------------------------------------------------------------------------------------------------------------------------------------------------|
| 1  | perineural spread                            |                                                                                                                                                     |
| 2  | MRI                                          |                                                                                                                                                     |
| 3  | perineural invasion                          |                                                                                                                                                     |
| 4  | CT                                           |                                                                                                                                                     |
| 5  | computed tomography                          |                                                                                                                                                     |
| 6  | FDG PET or PET or 18F-fluorodeoxyglucose PET |                                                                                                                                                     |
| 7  | retrospective analysis                       |                                                                                                                                                     |
| 8  | MRI OR CT*                                   |                                                                                                                                                     |
| 9  | pathologic correlation                       |                                                                                                                                                     |
| 10 | radiologic-pathologic correlation            |                                                                                                                                                     |
| 11 | magnetic resonance imaging                   |                                                                                                                                                     |
| 12 | perineural tumor spread                      |                                                                                                                                                     |
| 13 | perineural tumor invasion                    |                                                                                                                                                     |
| 14 | head and neck tumors                         |                                                                                                                                                     |
| 15 | head and neck cancer                         |                                                                                                                                                     |
|    |                                              |                                                                                                                                                     |
|    | AND/1-2                                      | perineural spread And MRI<br>"perineural spread" And MRI                                                                                            |
|    | AND/3,2                                      | perineural invasion And MRI<br>"perineural invasion" And MRI                                                                                        |
|    | AND/1,4                                      | perineural spread And CT<br>"perineural spread" And CT                                                                                              |
|    | AND/1,6                                      | "perineural spread" And FDG PET<br>perineural spread And FDG PET<br>"perineural spread" And PET<br>perineural spread And 18F-fluorodeoxyglucose PET |
|    | AND/1 ,7                                     | perineural spread And retrospective analysis                                                                                                        |
|    | AND/1 ,8                                     | "perineural spread" AND (MRI OR CT*)                                                                                                                |
|    | AND/3 ,9                                     | perineural invasion And pathology correlation                                                                                                       |
|    | AND/1, 10                                    | perineural spread And radiologic-pathologic correlation                                                                                             |
|    | AND/1 ,11                                    | perineural spread And magnetic resonance imaging                                                                                                    |
|    | AND/1 ,5                                     | perineural spread And computed tomography                                                                                                           |
|    | OR/AND 12,2,1,6                              | (perineural tumour spread OR MRI) AND (perineural spread OR PET)                                                                                    |
|    | OR/AND 13, 2, 1, 6                           | (perineural tumor invasion OR MRI) AND (perineural spread OR PET)                                                                                   |
|    | OR/AND 12, 2, 1, 4                           | (perineural tumour spread OR MRI) AND (perineural spread OR CT)                                                                                     |
|    | OR/AND 12,2,1,9                              | (perineural tumour spread OR MRI) AND (perineural spread OR pathologic correlation)                                                                 |
|    | AND 9, 14                                    | pathologic correlation AND head and neck tumors                                                                                                     |
|    | OR 1,15, 4, 2                                | [perineural spread] OR [head and neck cancer] OR [CT] OR [MRI]                                                                                      |
|    | AND                                          | [18F-FDG PET], [perineural spread], [head and neck cancer], [CT], and [MRI]                                                                         |
