# Supplementary material for: Diagnostic Accuracy of MRI in Detecting the Perineural Spread of Head and Neck Tumors: A Systematic Review and Meta-Analysis
Source: Diagnostics (Basel). 2024 Jan 4;14(1):113. doi: 10.3390/diagnostics14010113 (PMC10795679; doi:10.3390/diagnostics14010113)
Supplement: Supplementary file 1 [file diagnostics-14-00113-s001.zip]

Archive with 9 entries (9 files):
- Checklist S1 PRISMA_2020_checklist.docx.pdf
- Table S1 QUADAS-2 assessments.pdf
- Table S2 Summary of cranial nerves afflicted by PNS, site of tumor origin and histology..pdf
- Table S3 Summary of MRI vendors and MRI protocols in the studies.pdf
- Table S4 MRI protocols used in the studies.pdf
- Table S5 Distribution of trigeminal and facial nerves afflicted by PNS in the studies.pdf
- Table S6 Summary of histological forms of head and neck tumors afflicted by PNS.pdf
- Table S7 Database Search strategy.pdf
- Table S8 QUADAS-2 domains and questions.pdf
